# Supplementary material for: Fatty acid fingerprints in bronchoalveolar lavage fluid and its extracellular vesicles reflect equine asthma severity
Source: PubMed Central journal article supplement (PMC10276833; doi:10.1038/s41598-023-36697-x), 2023-06-17
Supplement: 41598_2023_36697_MOESM1_ESM.pdf [file 41598_2023_36697_MOESM1_ESM.pdf]

**Supplementary table 1.** Fatty acid (FA) proportions (mol-%, listed in the order of retention times of chromatographic peaks), sums, and indices in the bronchoalveolar lavage fluid of horses according to the severity of asthma (mean  $\pm$  SE).

| FA/sum/index               | Control                        | MMEA                            | SEA                             | P        |
|----------------------------|--------------------------------|---------------------------------|---------------------------------|----------|
| 14:0 <i>i</i>              | 0.299 $\pm$ 0.085              | 0.347 $\pm$ 0.153               | 0.538 $\pm$ 0.198               | 0.479    |
| 14:0                       | 6.570 $\pm$ 0.443              | 6.765 $\pm$ 0.743               | 5.536 $\pm$ 0.531               | 0.433    |
| 14:1n-5                    | 0.131 $\pm$ 0.034              | 0.172 $\pm$ 0.053               | 0.283 $\pm$ 0.098               | 0.148    |
| 15:0 <i>i</i>              | 0.133 $\pm$ 0.037              | 0.104 $\pm$ 0.040               | 0.129 $\pm$ 0.052               | 0.851    |
| 15:0 <i>ai</i>             | 0.182 $\pm$ 0.046              | 0.196 $\pm$ 0.046               | 0.262 $\pm$ 0.067               | 0.607    |
| 15:0                       | 0.403 $\pm$ 0.028              | 0.357 $\pm$ 0.055               | 0.366 $\pm$ 0.058               | 0.659    |
| 16:0 <i>i</i>              | 0.435 $\pm$ 0.040              | 0.392 $\pm$ 0.036               | 0.638 $\pm$ 0.216               | 0.098    |
| 16:0                       | 57.107 $\pm$ 0.900             | 54.879 $\pm$ 3.190              | 50.248 $\pm$ 5.026              | 0.187    |
| 16:1n-9                    | 0.382 $\pm$ 0.041 <sup>b</sup> | 0.298 $\pm$ 0.056 <sup>ab</sup> | 0.187 $\pm$ 0.022 <sup>a</sup>  | 0.030    |
| 16:1n-7                    | 5.116 $\pm$ 0.478 <sup>b</sup> | 4.765 $\pm$ 0.814 <sup>b</sup>  | 2.059 $\pm$ 0.218 <sup>a</sup>  | 0.007    |
| 16:1n-5                    | 0.043 $\pm$ 0.007              | 0.073 $\pm$ 0.024               | 0.091 $\pm$ 0.018               | 0.095    |
| 17:0 <i>i</i>              | 0.184 $\pm$ 0.030              | 0.298 $\pm$ 0.096               | 0.421 $\pm$ 0.104               | 0.061    |
| 17:0 <i>ai</i>             | 0.196 $\pm$ 0.015 <sup>b</sup> | 0.146 $\pm$ 0.017 <sup>a</sup>  | 0.236 $\pm$ 0.017 <sup>c</sup>  | 0.003    |
| 17:0                       | 0.341 $\pm$ 0.033 <sup>a</sup> | 0.351 $\pm$ 0.043 <sup>a</sup>  | 0.507 $\pm$ 0.035 <sup>b</sup>  | 0.021    |
| 17:1n-8                    | 0.282 $\pm$ 0.046              | 0.211 $\pm$ 0.036               | 0.141 $\pm$ 0.024               | 0.116    |
| 18:0 <i>i</i>              | 0.145 $\pm$ 0.020              | 0.286 $\pm$ 0.105               | 0.310 $\pm$ 0.087               | 0.127    |
| 18:0                       | 6.327 $\pm$ 0.615 <sup>a</sup> | 8.342 $\pm$ 1.352 <sup>ab</sup> | 11.310 $\pm$ 1.396 <sup>b</sup> | 0.006    |
| 18:1n-9                    | 13.195 $\pm$ 0.589             | 13.080 $\pm$ 1.417              | 13.730 $\pm$ 2.689              | 0.946    |
| 18:1n-7                    | 1.268 $\pm$ 0.086              | 1.375 $\pm$ 0.194               | 1.439 $\pm$ 0.287               | 0.733    |
| 18:1n-5                    | 0.131 $\pm$ 0.039              | 0.343 $\pm$ 0.152               | 0.492 $\pm$ 0.213               | 0.070    |
| 19:0 <i>i</i>              | 0.063 $\pm$ 0.012              | 0.075 $\pm$ 0.015               | 0.081 $\pm$ 0.013               | 0.655    |
| 18:2n-6                    | 2.276 $\pm$ 0.276              | 1.808 $\pm$ 0.244               | 1.299 $\pm$ 0.165               | 0.068    |
| 19:0                       | 1.186 $\pm$ 0.337              | 1.507 $\pm$ 0.470               | 2.010 $\pm$ 0.578               | 0.456    |
| 19:1n-10                   | 0.043 $\pm$ 0.008              | 0.048 $\pm$ 0.011               | 0.109 $\pm$ 0.070               | 0.118    |
| 19:1n-8                    | 0.050 $\pm$ 0.014              | 0.050 $\pm$ 0.016               | 0.193 $\pm$ 0.154               | 0.094    |
| 18:3n-3                    | 1.091 $\pm$ 0.128              | 0.888 $\pm$ 0.134               | 0.580 $\pm$ 0.148               | 0.063    |
| 18:2 <i>c9t11</i>          | 0.397 $\pm$ 0.086 <sup>a</sup> | 0.909 $\pm$ 0.264 <sup>a</sup>  | 1.696 $\pm$ 0.500 <sup>b</sup>  | 0.000456 |
| 20:0                       | 0.096 $\pm$ 0.011 <sup>a</sup> | 0.142 $\pm$ 0.034 <sup>a</sup>  | 0.246 $\pm$ 0.039 <sup>b</sup>  | 0.000369 |
| 20:1n-11                   | 0.018 $\pm$ 0.003 <sup>a</sup> | 0.019 $\pm$ 0.005 <sup>a</sup>  | 0.058 $\pm$ 0.031 <sup>b</sup>  | 0.012    |
| 20:1n-9                    | 0.157 $\pm$ 0.032              | 0.146 $\pm$ 0.042               | 0.689 $\pm$ 0.580               | 0.080    |
| 20:1n-7                    | 0.009 $\pm$ 0.002 <sup>a</sup> | 0.013 $\pm$ 0.004 <sup>a</sup>  | 0.076 $\pm$ 0.060 <sup>b</sup>  | 0.023    |
| 20:2n-6                    | 0.100 $\pm$ 0.020 <sup>a</sup> | 0.130 $\pm$ 0.030 <sup>a</sup>  | 0.427 $\pm$ 0.302 <sup>b</sup>  | 0.043    |
| 20:3n-6                    | 0.063 $\pm$ 0.011 <sup>a</sup> | 0.104 $\pm$ 0.023 <sup>ab</sup> | 0.161 $\pm$ 0.057 <sup>b</sup>  | 0.016    |
| 20:4n-6                    | 0.221 $\pm$ 0.037              | 0.230 $\pm$ 0.035               | 0.247 $\pm$ 0.061               | 0.925    |
| 20:3n-3                    | 0.130 $\pm$ 0.049              | 0.138 $\pm$ 0.057               | 1.007 $\pm$ 0.935               | 0.074    |
| 20:5n-3                    | 0.092 $\pm$ 0.021              | 0.097 $\pm$ 0.022               | 0.159 $\pm$ 0.079               | 0.354    |
| 22:0                       | 0.031 $\pm$ 0.007              | 0.031 $\pm$ 0.008               | 0.054 $\pm$ 0.020               | 0.270    |
| 22:1n-9                    | 0.200 $\pm$ 0.091              | 0.094 $\pm$ 0.021               | 0.093 $\pm$ 0.021               | 0.494    |
| 22:5n-3                    | 0.119 $\pm$ 0.022              | 0.253 $\pm$ 0.079               | 0.240 $\pm$ 0.050               | 0.074    |
| 24:0                       | 0.076 $\pm$ 0.023              | 0.083 $\pm$ 0.016               | 0.105 $\pm$ 0.021               | 0.724    |
| 22:6n-3 (w/ artefact)      | 0.630 $\pm$ 0.175              | 0.404 $\pm$ 0.200               | 1.454 $\pm$ 1.148               | 0.210    |
| 24:1n-9                    | 0.083 $\pm$ 0.015              | 0.052 $\pm$ 0.012               | 0.090 $\pm$ 0.025               | 0.222    |
| $\Sigma$ :SFA              | 73.773 $\pm$ 0.903             | 74.300 $\pm$ 2.329              | 72.999 $\pm$ 4.446              | 0.922    |
| $\Sigma$ :MUFA             | 21.107 $\pm$ 0.784             | 20.739 $\pm$ 1.871              | 19.731 $\pm$ 3.586              | 0.859    |
| $\Sigma$ :PUFA             | 5.120 $\pm$ 0.460              | 4.961 $\pm$ 0.641               | 7.270 $\pm$ 2.191               | 0.176    |
| $\Sigma$ :n-6 PUFA         | 2.660 $\pm$ 0.273              | 2.272 $\pm$ 0.266               | 2.134 $\pm$ 0.473               | 0.433    |
| $\Sigma$ :n-3 PUFA         | 2.062 $\pm$ 0.263              | 1.780 $\pm$ 0.330               | 3.439 $\pm$ 1.362               | 0.093    |
| UFA/SFA                    | 0.358 $\pm$ 0.016              | 0.358 $\pm$ 0.043               | 0.392 $\pm$ 0.089               | 0.832    |
| n-3/n-6 PUFA (w/ 22:6n-3)  | 0.796 $\pm$ 0.092 <sup>a</sup> | 0.772 $\pm$ 0.092 <sup>a</sup>  | 1.509 $\pm$ 0.524 <sup>b</sup>  | 0.017    |
| n-3/n-6 PUFA (w/o 22:6n-3) | 0.560 $\pm$ 0.047              | 0.631 $\pm$ 0.078               | 0.736 $\pm$ 0.245               | 0.440    |
| TACL                       | 16.399 $\pm$ 0.031             | 16.443 $\pm$ 0.083              | 16.497 $\pm$ 0.100              | 0.571    |
| $\Delta$ 9-DI              | 0.289 $\pm$ 0.014              | 0.292 $\pm$ 0.035               | 0.279 $\pm$ 0.064               | 0.960    |
| $\Delta$ 5-DI (n-6 PUFA)   | 3.850 $\pm$ 0.389 <sup>b</sup> | 2.683 $\pm$ 0.349 <sup>ab</sup> | 1.832 $\pm$ 0.263 <sup>a</sup>  | 0.002    |
| DBI                        | 0.362 $\pm$ 0.018              | 0.349 $\pm$ 0.036               | 0.435 $\pm$ 0.083               | 0.289    |
| Prod/prec (n-6 PUFA)       | 0.151 $\pm$ 0.032 <sup>a</sup> | 0.213 $\pm$ 0.039 <sup>ab</sup> | 0.323 $\pm$ 0.081 <sup>b</sup>  | 0.029    |
| Prod/prec (n-3 PUFA)       | 0.686 $\pm$ 0.159 <sup>a</sup> | 0.467 $\pm$ 0.153 <sup>a</sup>  | 4.735 $\pm$ 3.914 <sup>b</sup>  | 0.033    |

MMEA = mild/moderate asthma, SEA = severe asthma, *i* = *iso*-methyl-branch, *ai* = *anteiso*-methyl-branch, *c* = *cis*, *t* = *trans*,  $\Sigma$  = sum, SFA = saturated FA, MUFA = monounsaturated FA, PUFA = polyunsaturated FA, UFA = unsaturated FA, TACL = total average chain length,  $\Delta$ 9-DI = delta-9 desaturation index,  $\Delta$ 5-DI = delta-5 desaturation index, DBI = double bond index, prod = product, prec = precursor, different superscript letters indicate significant differences between the means within a row (generalized linear model,  $p < 0.05$ )

**Supplementary table 2.** Fatty acid (FA) proportions (mol-%, listed in the order of retention times of chromatographic peaks), sums, and indices in the supernatant of bronchoalveolar lavage fluid of horses according to the severity of asthma (mean  $\pm$  SE).

| FA/sum/index               | Control                        | MMEA                           | SEA                             | P        |
|----------------------------|--------------------------------|--------------------------------|---------------------------------|----------|
| 14:0 <i>i</i>              | 0.042 $\pm$ 0.008 <sup>a</sup> | 0.125 $\pm$ 0.023 <sup>b</sup> | 0.090 $\pm$ 0.047 <sup>ab</sup> | 0.002    |
| 14:0                       | 4.698 $\pm$ 0.201              | 6.090 $\pm$ 0.817              | 4.830 $\pm$ 0.526               | 0.090    |
| 14:1n-5                    | 0.054 $\pm$ 0.016 <sup>a</sup> | 0.148 $\pm$ 0.039 <sup>b</sup> | 0.089 $\pm$ 0.028 <sup>ab</sup> | 0.021    |
| 15:0 <i>i</i>              | 0.049 $\pm$ 0.005              | 0.064 $\pm$ 0.005              | 0.059 $\pm$ 0.003               | 0.070    |
| 15:0 <i>ai</i>             | 0.051 $\pm$ 0.006 <sup>a</sup> | 0.120 $\pm$ 0.018 <sup>b</sup> | 0.079 $\pm$ 0.017 <sup>ab</sup> | 0.000095 |
| 15:0                       | 0.383 $\pm$ 0.032              | 0.435 $\pm$ 0.068              | 0.427 $\pm$ 0.031               | 0.667    |
| 16:0 <i>i</i>              | 0.316 $\pm$ 0.028              | 0.339 $\pm$ 0.046              | 0.396 $\pm$ 0.046               | 0.403    |
| 16:0                       | 56.108 $\pm$ 0.598             | 53.913 $\pm$ 1.883             | 55.306 $\pm$ 1.670              | 0.396    |
| 16:1n-9                    | 0.457 $\pm$ 0.027              | 0.406 $\pm$ 0.042              | 0.521 $\pm$ 0.069               | 0.185    |
| 16:1n-7                    | 6.113 $\pm$ 0.370              | 6.294 $\pm$ 0.484              | 6.059 $\pm$ 0.701               | 0.934    |
| 16:1n-5                    | 0.038 $\pm$ 0.008 <sup>a</sup> | 0.085 $\pm$ 0.021 <sup>b</sup> | 0.048 $\pm$ 0.016 <sup>ab</sup> | 0.033    |
| 17:0 <i>i</i>              | 0.067 $\pm$ 0.005 <sup>a</sup> | 0.154 $\pm$ 0.046 <sup>b</sup> | 0.084 $\pm$ 0.012 <sup>ab</sup> | 0.037    |
| 17:0 <i>ai</i>             | 0.182 $\pm$ 0.011              | 0.229 $\pm$ 0.070              | 0.181 $\pm$ 0.018               | 0.638    |
| 17:0                       | 0.294 $\pm$ 0.018              | 0.335 $\pm$ 0.038              | 0.339 $\pm$ 0.035               | 0.414    |
| 17:1n-8                    | 0.278 $\pm$ 0.017              | 0.242 $\pm$ 0.023              | 0.311 $\pm$ 0.032               | 0.135    |
| 18:0 <i>i</i>              | 0.081 $\pm$ 0.007              | 0.181 $\pm$ 0.063              | 0.106 $\pm$ 0.012               | 0.097    |
| 18:0                       | 5.653 $\pm$ 0.190              | 6.875 $\pm$ 0.972              | 5.683 $\pm$ 0.129               | 0.218    |
| 18:1n-9                    | 17.657 $\pm$ 0.445             | 15.578 $\pm$ 0.964             | 17.286 $\pm$ 1.592              | 0.107    |
| 18:1n-7                    | 1.502 $\pm$ 0.059              | 1.561 $\pm$ 0.124              | 1.710 $\pm$ 0.083               | 0.344    |
| 18:1n-5                    | 0.025 $\pm$ 0.003              | 0.099 $\pm$ 0.043              | 0.042 $\pm$ 0.006               | 0.061    |
| 19:0 <i>i</i>              | 0.016 $\pm$ 0.001 <sup>a</sup> | 0.040 $\pm$ 0.011 <sup>b</sup> | 0.021 $\pm$ 0.003 <sup>ab</sup> | 0.014    |
| 18:2n-6                    | 2.940 $\pm$ 0.256              | 2.349 $\pm$ 0.190              | 2.535 $\pm$ 0.461               | 0.201    |
| 19:0                       | 0.358 $\pm$ 0.054              | 0.813 $\pm$ 0.266              | 0.398 $\pm$ 0.063               | 0.067    |
| 19:1n-10                   | 0.036 $\pm$ 0.003              | 0.052 $\pm$ 0.016              | 0.033 $\pm$ 0.006               | 0.386    |
| 19:1n-8                    | 0.045 $\pm$ 0.004              | 0.045 $\pm$ 0.007              | 0.047 $\pm$ 0.010               | 0.972    |
| 18:3n-3                    | 1.322 $\pm$ 0.125              | 1.093 $\pm$ 0.119              | 1.502 $\pm$ 0.441               | 0.324    |
| 18:2 <i>c9t11</i>          | 0.106 $\pm$ 0.015              | 0.325 $\pm$ 0.131              | 0.161 $\pm$ 0.047               | 0.080    |
| 20:0                       | 0.063 $\pm$ 0.003 <sup>a</sup> | 0.115 $\pm$ 0.021 <sup>b</sup> | 0.093 $\pm$ 0.020 <sup>ab</sup> | 0.009    |
| 20:1n-11                   | 0.017 $\pm$ 0.002              | 0.021 $\pm$ 0.005              | 0.017 $\pm$ 0.002               | 0.505    |
| 20:1n-9                    | 0.160 $\pm$ 0.011              | 0.144 $\pm$ 0.011              | 0.171 $\pm$ 0.026               | 0.432    |
| 20:1n-7                    | 0.006 $\pm$ 0.001 <sup>a</sup> | 0.015 $\pm$ 0.004 <sup>b</sup> | 0.009 $\pm$ 0.003 <sup>ab</sup> | 0.019    |
| 20:2n-6                    | 0.062 $\pm$ 0.005              | 0.075 $\pm$ 0.008              | 0.061 $\pm$ 0.009               | 0.223    |
| 20:3n-6                    | 0.017 $\pm$ 0.002 <sup>a</sup> | 0.043 $\pm$ 0.006 <sup>b</sup> | 0.023 $\pm$ 0.002 <sup>a</sup>  | 0.000001 |
| 20:4n-6                    | 0.083 $\pm$ 0.007              | 0.118 $\pm$ 0.013              | 0.103 $\pm$ 0.026               | 0.054    |
| 20:3n-3                    | 0.097 $\pm$ 0.013              | 0.088 $\pm$ 0.011              | 0.103 $\pm$ 0.023               | 0.797    |
| 20:5n-3                    | 0.028 $\pm$ 0.004              | 0.041 $\pm$ 0.005              | 0.038 $\pm$ 0.007               | 0.084    |
| 22:0                       | 0.011 $\pm$ 0.002              | 0.015 $\pm$ 0.003              | 0.025 $\pm$ 0.010               | 0.051    |
| 22:1n-9                    | 0.031 $\pm$ 0.009              | 0.059 $\pm$ 0.015              | 0.046 $\pm$ 0.014               | 0.161    |
| 22:5n-3                    | 0.056 $\pm$ 0.005 <sup>a</sup> | 0.103 $\pm$ 0.024 <sup>b</sup> | 0.103 $\pm$ 0.028 <sup>ab</sup> | 0.040    |
| 24:0                       | 0.037 $\pm$ 0.003 <sup>a</sup> | 0.070 $\pm$ 0.015 <sup>b</sup> | 0.060 $\pm$ 0.020 <sup>ab</sup> | 0.040    |
| 22:6n-3 (w/ artefact)      | 0.387 $\pm$ 0.086              | 1.010 $\pm$ 0.370              | 0.676 $\pm$ 0.320               | 0.123    |
| 24:1n-9                    | 0.076 $\pm$ 0.005              | 0.095 $\pm$ 0.024              | 0.129 $\pm$ 0.052               | 0.243    |
| $\Sigma$ :SFA              | 68.409 $\pm$ 0.613             | 69.912 $\pm$ 0.938             | 68.177 $\pm$ 1.925              | 0.346    |
| $\Sigma$ :MUFA             | 26.493 $\pm$ 0.627             | 24.843 $\pm$ 1.027             | 26.517 $\pm$ 1.458              | 0.267    |
| $\Sigma$ :PUFA             | 5.098 $\pm$ 0.360              | 5.245 $\pm$ 0.451              | 5.306 $\pm$ 0.985               | 0.951    |
| $\Sigma$ :n-6 PUFA         | 3.103 $\pm$ 0.262              | 2.584 $\pm$ 0.193              | 2.722 $\pm$ 0.477               | 0.303    |
| $\Sigma$ :n-3 PUFA         | 1.890 $\pm$ 0.161              | 2.335 $\pm$ 0.363              | 2.423 $\pm$ 0.517               | 0.334    |
| UFA/SFA                    | 0.463 $\pm$ 0.013              | 0.433 $\pm$ 0.019              | 0.472 $\pm$ 0.044               | 0.361    |
| n-3/n-6 PUFA (w/ 22:6n-3)  | 0.642 $\pm$ 0.052              | 0.923 $\pm$ 0.150              | 0.865 $\pm$ 0.086               | 0.063    |
| n-3/n-6 PUFA (w/o 22:6n-3) | 0.501 $\pm$ 0.038              | 0.533 $\pm$ 0.058              | 0.615 $\pm$ 0.088               | 0.379    |
| TACL                       | 16.493 $\pm$ 0.020             | 16.497 $\pm$ 0.062             | 16.502 $\pm$ 0.051              | 0.991    |
| $\Delta$ 9-DI              | 0.389 $\pm$ 0.012              | 0.362 $\pm$ 0.021              | 0.393 $\pm$ 0.034               | 0.433    |
| $\Delta$ 5-DI (n-6 PUFA)   | 5.657 $\pm$ 0.532 <sup>b</sup> | 3.110 $\pm$ 0.353 <sup>a</sup> | 4.271 $\pm$ 0.681 <sup>ab</sup> | 0.00045  |
| DBI                        | 0.401 $\pm$ 0.010              | 0.413 $\pm$ 0.021              | 0.421 $\pm$ 0.033               | 0.722    |
| Prod/prec (n-6 PUFA)       | 0.036 $\pm$ 0.003 <sup>a</sup> | 0.072 $\pm$ 0.009 <sup>b</sup> | 0.055 $\pm$ 0.011 <sup>ab</sup> | 0.000057 |
| Prod/prec (n-3 PUFA)       | 0.357 $\pm$ 0.076              | 1.125 $\pm$ 0.430              | 0.689 $\pm$ 0.336               | 0.083    |

MMEA = mild/moderate asthma, SEA = severe asthma, *i* = *iso*-methyl-branch, *ai* = *anteiso*-methyl-branch, *c* = *cis*, *t* = *trans*,  $\Sigma$  = sum, SFA = saturated FA, MUFA = monounsaturated FA, PUFA = polyunsaturated FA, UFA = unsaturated FA, TACL = total average chain length,  $\Delta$ 9-DI = delta-9 desaturation index,  $\Delta$ 5-DI = delta-5 desaturation index, DBI = double bond index, prod = product, prec = precursor, different superscript letters indicate significant differences between the means within a row (generalized linear model,  $p < 0.05$ )

**Supplementary table 3.** Fatty acid (FA) proportions (mol-%, listed in the order of retention times of chromatographic peaks), sums, and indices in the extracellular vesicles of bronchoalveolar lavage fluid of horses according to the severity of asthma (mean  $\pm$  SE).

| FA/sum/index               | Control                         | MMEA                            | SEA                             | P        |
|----------------------------|---------------------------------|---------------------------------|---------------------------------|----------|
| 14:0 <i>i</i>              | 0.204 $\pm$ 0.058 <sup>a</sup>  | 0.189 $\pm$ 0.046 <sup>a</sup>  | 0.704 $\pm$ 0.266 <sup>b</sup>  | 0.001    |
| 14:0                       | 5.113 $\pm$ 0.221               | 5.838 $\pm$ 0.563               | 5.316 $\pm$ 0.770               | 0.389    |
| 14:1n-5                    | 0.116 $\pm$ 0.030 <sup>a</sup>  | 0.133 $\pm$ 0.034 <sup>a</sup>  | 0.348 $\pm$ 0.098 <sup>b</sup>  | 0.001    |
| 15:0 <i>i</i>              | 0.086 $\pm$ 0.021               | 0.073 $\pm$ 0.011               | 0.143 $\pm$ 0.042               | 0.149    |
| 15:0 <i>ai</i>             | 0.137 $\pm$ 0.026 <sup>a</sup>  | 0.136 $\pm$ 0.032 <sup>a</sup>  | 0.442 $\pm$ 0.164 <sup>b</sup>  | 0.001    |
| 15:0                       | 0.347 $\pm$ 0.032               | 0.407 $\pm$ 0.062               | 0.289 $\pm$ 0.042               | 0.290    |
| 16:0 <i>i</i>              | 0.417 $\pm$ 0.044               | 0.401 $\pm$ 0.027               | 0.520 $\pm$ 0.120               | 0.363    |
| 16:0                       | 55.097 $\pm$ 1.340 <sup>b</sup> | 53.231 $\pm$ 2.600 <sup>b</sup> | 43.007 $\pm$ 4.578 <sup>a</sup> | 0.003    |
| 16:1n-9                    | 0.386 $\pm$ 0.029               | 0.358 $\pm$ 0.034               | 0.398 $\pm$ 0.084               | 0.781    |
| 16:1n-7                    | 5.299 $\pm$ 0.404               | 5.275 $\pm$ 0.588               | 4.914 $\pm$ 1.551               | 0.925    |
| 16:1n-5                    | 0.038 $\pm$ 0.004 <sup>a</sup>  | 0.041 $\pm$ 0.007 <sup>a</sup>  | 0.111 $\pm$ 0.040 <sup>b</sup>  | 0.000273 |
| 17:0 <i>i</i>              | 0.172 $\pm$ 0.032 <sup>a</sup>  | 0.235 $\pm$ 0.082 <sup>a</sup>  | 0.530 $\pm$ 0.163 <sup>b</sup>  | 0.004    |
| 17:0 <i>ai</i>             | 0.186 $\pm$ 0.015 <sup>a</sup>  | 0.176 $\pm$ 0.031 <sup>a</sup>  | 0.354 $\pm$ 0.111 <sup>b</sup>  | 0.007    |
| 17:0                       | 0.329 $\pm$ 0.025 <sup>a</sup>  | 0.385 $\pm$ 0.052 <sup>a</sup>  | 0.894 $\pm$ 0.353 <sup>b</sup>  | 0.001    |
| 17:1n-8                    | 0.239 $\pm$ 0.018 <sup>b</sup>  | 0.202 $\pm$ 0.023 <sup>a</sup>  | 0.315 $\pm$ 0.036 <sup>c</sup>  | 0.011    |
| 18:0 <i>i</i>              | 0.211 $\pm$ 0.059               | 0.225 $\pm$ 0.071               | 0.366 $\pm$ 0.196               | 0.486    |
| 18:0                       | 6.907 $\pm$ 0.488               | 8.765 $\pm$ 1.539               | 11.465 $\pm$ 3.167              | 0.072    |
| 18:1n-9                    | 15.650 $\pm$ 0.591              | 15.669 $\pm$ 1.206              | 18.228 $\pm$ 2.319              | 0.266    |
| 18:1n-7                    | 1.493 $\pm$ 0.081               | 1.562 $\pm$ 0.131               | 1.847 $\pm$ 0.271               | 0.198    |
| 18:1n-5                    | 0.173 $\pm$ 0.051               | 0.286 $\pm$ 0.110               | 0.550 $\pm$ 0.240               | 0.055    |
| 19:0 <i>i</i>              | 0.061 $\pm$ 0.011 <sup>a</sup>  | 0.067 $\pm$ 0.020 <sup>a</sup>  | 0.145 $\pm$ 0.043 <sup>b</sup>  | 0.014    |
| 18:2n-6                    | 2.398 $\pm$ 0.233               | 2.026 $\pm$ 0.202               | 1.931 $\pm$ 0.322               | 0.336    |
| 19:0                       | 1.864 $\pm$ 0.557               | 1.237 $\pm$ 0.397               | 2.092 $\pm$ 0.639               | 0.567    |
| 19:1n-10                   | 0.055 $\pm$ 0.011               | 0.045 $\pm$ 0.011               | 0.065 $\pm$ 0.022               | 0.628    |
| 19:1n-8                    | 0.040 $\pm$ 0.006               | 0.042 $\pm$ 0.016               | 0.054 $\pm$ 0.026               | 0.766    |
| 18:3n-3                    | 1.121 $\pm$ 0.111               | 0.840 $\pm$ 0.068               | 1.335 $\pm$ 0.463               | 0.152    |
| 18:2 <i>c9t11</i>          | 0.598 $\pm$ 0.207               | 0.760 $\pm$ 0.268               | 1.265 $\pm$ 0.639               | 0.346    |
| 20:0                       | 0.089 $\pm$ 0.009 <sup>a</sup>  | 0.148 $\pm$ 0.037 <sup>ab</sup> | 0.220 $\pm$ 0.060 <sup>b</sup>  | 0.008    |
| 20:1n-11                   | 0.017 $\pm$ 0.003               | 0.016 $\pm$ 0.002               | 0.029 $\pm$ 0.007               | 0.052    |
| 20:1n-9                    | 0.130 $\pm$ 0.012               | 0.156 $\pm$ 0.035               | 0.150 $\pm$ 0.020               | 0.652    |
| 20:1n-7                    | 0.008 $\pm$ 0.001 <sup>a</sup>  | 0.011 $\pm$ 0.003 <sup>a</sup>  | 0.020 $\pm$ 0.004 <sup>b</sup>  | 0.003    |
| 20:2n-6                    | 0.069 $\pm$ 0.006               | 0.090 $\pm$ 0.024               | 0.134 $\pm$ 0.042               | 0.071    |
| 20:3n-6                    | 0.055 $\pm$ 0.011 <sup>a</sup>  | 0.065 $\pm$ 0.016 <sup>a</sup>  | 0.122 $\pm$ 0.025 <sup>b</sup>  | 0.016    |
| 20:4n-6                    | 0.128 $\pm$ 0.023               | 0.122 $\pm$ 0.015               | 0.227 $\pm$ 0.068               | 0.054    |
| 20:3n-3                    | 0.084 $\pm$ 0.009               | 0.130 $\pm$ 0.064               | 0.074 $\pm$ 0.013               | 0.540    |
| 20:5n-3                    | 0.055 $\pm$ 0.011 <sup>a</sup>  | 0.051 $\pm$ 0.011 <sup>a</sup>  | 0.133 $\pm$ 0.058 <sup>b</sup>  | 0.021    |
| 22:0                       | 0.023 $\pm$ 0.006               | 0.021 $\pm$ 0.007               | 0.046 $\pm$ 0.017               | 0.120    |
| 22:1n-9                    | 0.058 $\pm$ 0.014               | 0.060 $\pm$ 0.011               | 0.097 $\pm$ 0.046               | 0.380    |
| 22:5n-3                    | 0.204 $\pm$ 0.056               | 0.226 $\pm$ 0.085               | 0.425 $\pm$ 0.196               | 0.253    |
| 24:0                       | 0.068 $\pm$ 0.016 <sup>a</sup>  | 0.062 $\pm$ 0.022 <sup>a</sup>  | 0.221 $\pm$ 0.071 <sup>b</sup>  | 0.001    |
| 22:6n-3 (w/ 22:6n-3)       | 0.200 $\pm$ 0.077               | 0.161 $\pm$ 0.049               | 0.336 $\pm$ 0.178               | 0.471    |
| 24:1n-9                    | 0.079 $\pm$ 0.014               | 0.076 $\pm$ 0.018               | 0.140 $\pm$ 0.045               | 0.110    |
| $\Sigma$ :SFA              | 71.309 $\pm$ 0.790 <sup>b</sup> | 71.597 $\pm$ 1.129 <sup>b</sup> | 66.754 $\pm$ 1.372 <sup>a</sup> | 0.008    |
| $\Sigma$ :MUFA             | 23.779 $\pm$ 0.757              | 23.932 $\pm$ 1.090              | 27.265 $\pm$ 1.523              | 0.068    |
| $\Sigma$ :PUFA             | 4.912 $\pm$ 0.375               | 4.472 $\pm$ 0.450               | 5.982 $\pm$ 1.248               | 0.234    |
| $\Sigma$ :n-6 PUFA         | 2.650 $\pm$ 0.228               | 2.303 $\pm$ 0.198               | 2.414 $\pm$ 0.416               | 0.529    |
| $\Sigma$ :n-3 PUFA         | 1.663 $\pm$ 0.168               | 1.408 $\pm$ 0.149               | 2.303 $\pm$ 0.710               | 0.107    |
| UFA/SFA                    | 0.405 $\pm$ 0.016 <sup>a</sup>  | 0.400 $\pm$ 0.023 <sup>a</sup>  | 0.501 $\pm$ 0.031 <sup>b</sup>  | 0.0006   |
| n-3/n-6 PUFA (w/ 22:6n-3)  | 0.664 $\pm$ 0.072               | 0.632 $\pm$ 0.072               | 0.893 $\pm$ 0.151               | 0.156    |
| n-3/n-6 PUFA (w/o 22:6n-3) | 0.580 $\pm$ 0.053               | 0.561 $\pm$ 0.056               | 0.779 $\pm$ 0.129               | 0.103    |
| TACL                       | 16.498 $\pm$ 0.043              | 16.493 $\pm$ 0.075              | 16.697 $\pm$ 0.155              | 0.158    |
| $\Delta$ 9-DI              | 0.344 $\pm$ 0.014 <sup>a</sup>  | 0.342 $\pm$ 0.021 <sup>a</sup>  | 0.433 $\pm$ 0.028 <sup>b</sup>  | 0.006    |
| $\Delta$ 5-DI (n-6 PUFA)   | 2.895 $\pm$ 0.352               | 2.732 $\pm$ 0.440               | 1.875 $\pm$ 0.337               | 0.273    |
| DBI                        | 0.367 $\pm$ 0.012 <sup>a</sup>  | 0.356 $\pm$ 0.016 <sup>a</sup>  | 0.442 $\pm$ 0.033 <sup>b</sup>  | 0.004    |
| Prod/prec (n-6 PUFA)       | 0.090 $\pm$ 0.020 <sup>a</sup>  | 0.099 $\pm$ 0.017 <sup>a</sup>  | 0.177 $\pm$ 0.026 <sup>b</sup>  | 0.025    |
| Prod/prec (n-3 PUFA)       | 0.247 $\pm$ 0.084               | 0.273 $\pm$ 0.091               | 0.331 $\pm$ 0.071               | 0.845    |

MMEA = mild/moderate asthma, SEA = severe asthma, *i* = *iso*-methyl-branch, *ai* = *anteiso*-methyl-branch, *c* = *cis*, *t* = *trans*,  $\Sigma$  = sum, SFA = saturated FA, MUFA = monounsaturated FA, PUFA = polyunsaturated FA, UFA = unsaturated FA, TACL = total average chain length,  $\Delta$ 9-DI = delta-9 desaturation index,  $\Delta$ 5-DI = delta-5 desaturation index, DBI = double bond index, prod = product, prec = precursor, different superscript letters indicate significant differences between the means within a row (generalized linear model,  $p < 0.05$ )

**Supplementary table 4.** Grouping of fatty acids derived from the Pearson correlations-based correlogram.

| <b>Group 1</b> | <b>Group 2</b> | <b>Group 3</b>    | <b>Group 4</b> | <b>Group 5</b> | <b>Group 6</b> |
|----------------|----------------|-------------------|----------------|----------------|----------------|
| 18:2n-6        | 14:0           | 16:1n-5           | 16:0 <i>i</i>  | 19:1n-10       | 19:0           |
| 16:1n-9        | 15:0           | 18:0 <i>i</i>     | 24:1n-9        | 20:1n-11       | 19:0 <i>i</i>  |
| 18:3n-3        | 16:0           | 22:5n-3           | 22:6n-3*       | 19:1n-8        | 24:0           |
|                | 16:1n-7        | 17:0 <i>i</i>     | 17:1n-8        | 20:1n-7        | 14:1n-5        |
|                |                | 18:2 <i>c9t11</i> | 15:0 <i>i</i>  | 20:2n-6        | 14:0 <i>i</i>  |
|                |                | 18:1n-5           | 22:1n-9        | 20:1n-9        | 15:0 <i>ai</i> |
|                |                | 18:0              |                | 20:3n-3        | 20:3n-6        |
|                |                | 20:0              |                |                | 22:0           |
|                |                | 17:0 <i>ai</i>    |                |                | 20:4n-6        |
|                |                | 17:0              |                |                | 20:5n-3        |
|                |                | 18:1n-7           |                |                |                |
|                |                | 18:1n-9           |                |                |                |

\*plus artefact

**Supplementary table 5.** Random Forest (RF) prediction accuracy for the different RF strategies and across sample types. Scores represent the averages of 20 leave-one-out RF runs.

| <b>Analysis type/Sample type</b>                                | <b>All samples</b> | <b>BALF</b> | <b>SUP</b> | <b>EVs</b> |
|-----------------------------------------------------------------|--------------------|-------------|------------|------------|
| FA data, grouping, enrichment                                   | 0.44               | 0.43        | 0.47       | 0.40       |
| FA and DI data, grouping, enrichment                            | 0.48               | 0.46        | 0.57       | 0.43       |
| FA and DI data, grouping, enrichment, DI excluded from RF model | 0.49               | 0.42        | 0.59       | 0.41       |
| FA data                                                         | 0.48               | 0.35        | 0.55       | 0.39       |

FA = fatty acid, DI = derived structural category sums, ratios, and indices of FAs, BALF = bronchoalveolar lavage fluid, SUP = BALF supernatant, EV = extracellular vesicles. The derived sums, ratios, and indices were as follows:  $\Delta 5$ -desaturation index,  $\Delta 9$ -desaturation index,  $\Sigma$ :SFA (saturated fatty acid),  $\Sigma$ :MUFA (monounsaturated fatty acid),  $\Sigma$ :PUFA (polyunsaturated fatty acid),  $\Sigma$ :n-3 PUFA,  $\Sigma$ :n-6 PUFA, double bond index, n-3/n-6 PUFA ratio (both with and without 22:6n-3), product/precursor ratios of n-3 PUFAs, product/precursor ratios of n-6 PUFAs, UFA (unsaturated fatty acid)/SFA ratio, total average chain length.

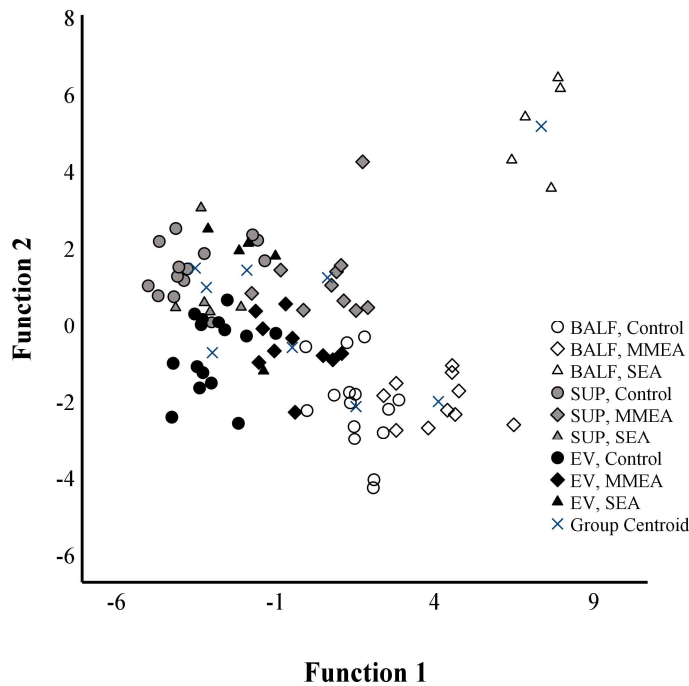

**Supplementary figure 1.** Discriminant analysis with 9 groups (bronchoalveolar lavage fluid = BALF, supernatant = SUP, and extracellular vesicles = EVs each assigned into either control, mild/moderate equine asthma = MMEA, or severe equine asthma = SEA), depicting the classification of fatty acid data in equine BALF, SUP, and EVs of control horses and horses with MMEA or SEA based on discriminant functions 1 (on x-axis) and 2 (y-axis). White symbols = BALF, grey symbols = SUP, black symbols = EVs. See Results for details.

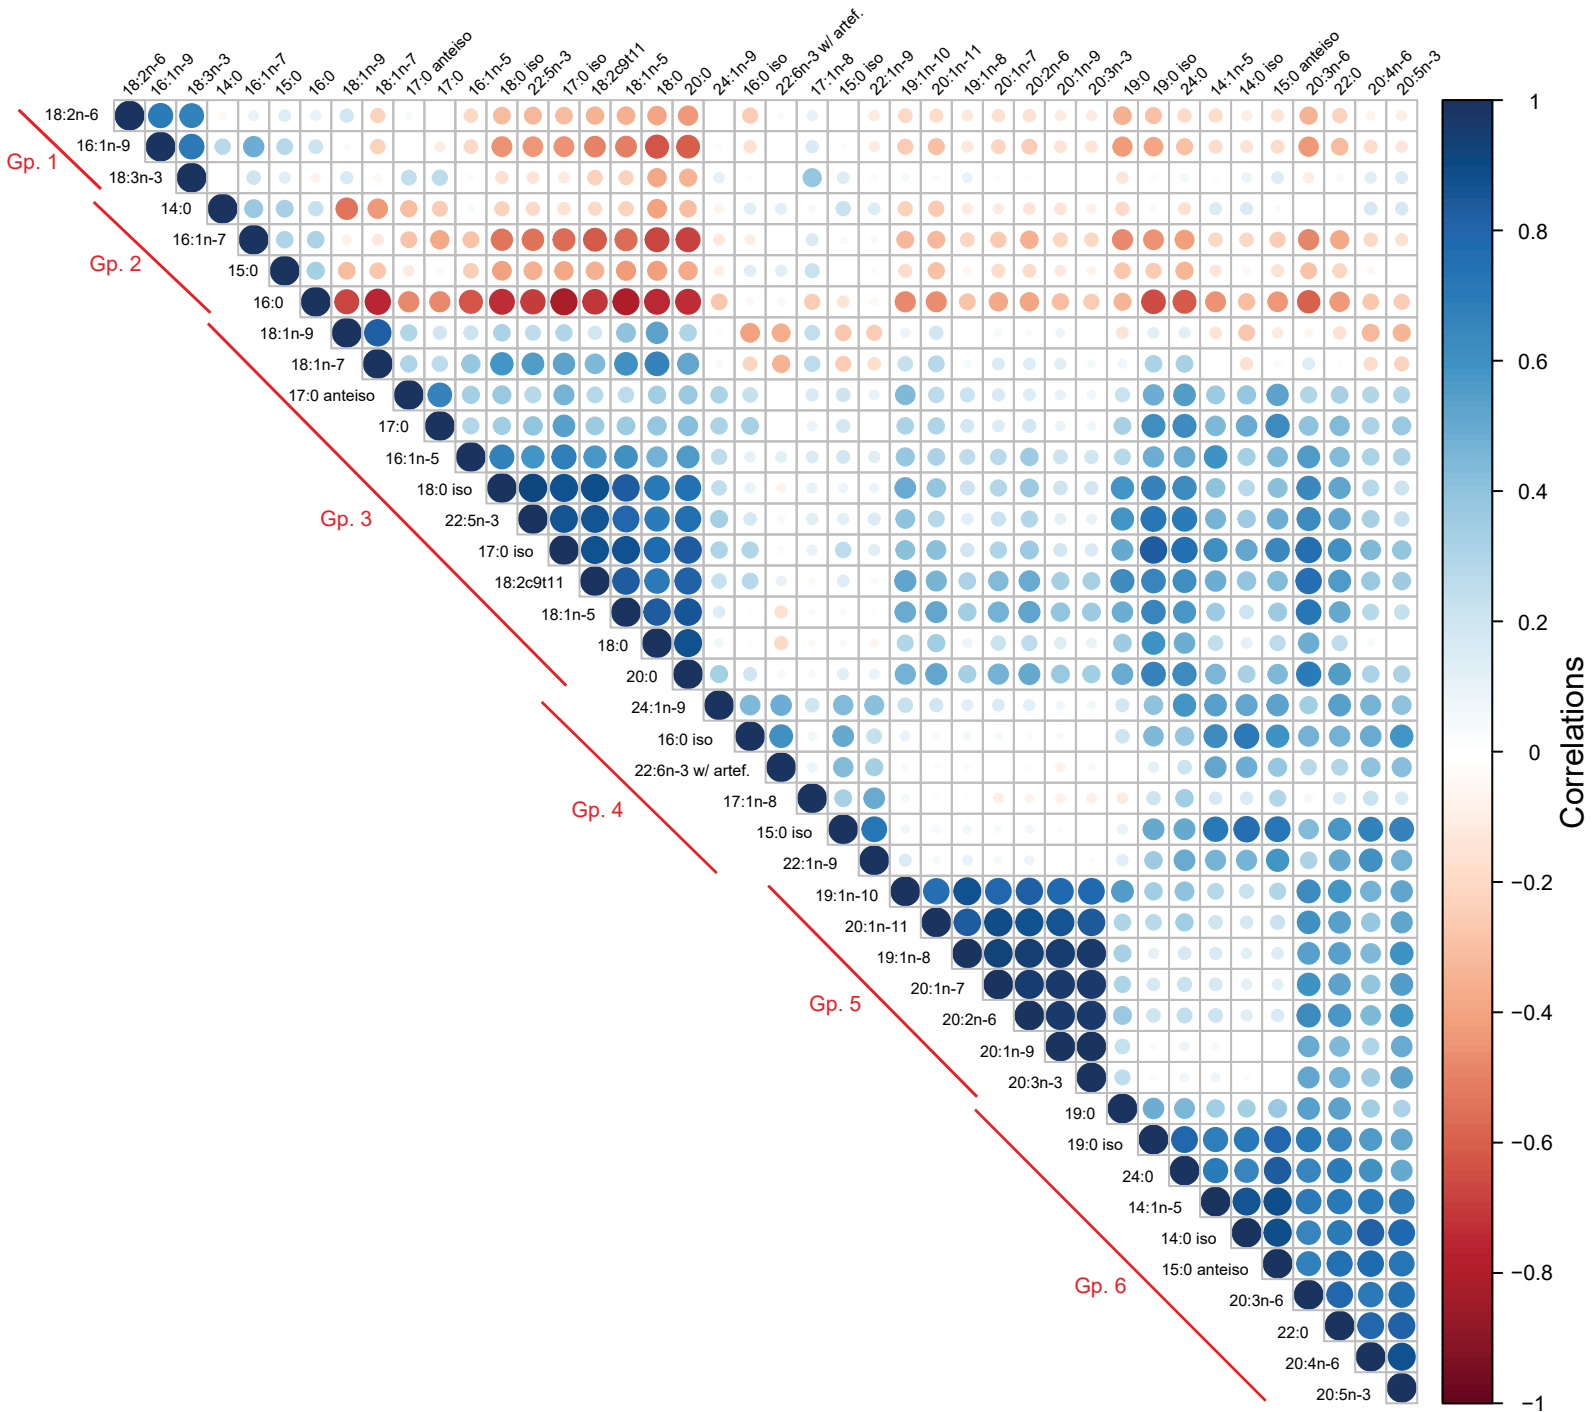

**Supplementary figure 2.** Correlogram showing the Pearson correlation coefficients between pairs of fatty acids (FAs) across all samples, color-coded as indicated. Dark blue (respectively red) indicates strong positive (respectively negative) correlations in FA levels, irrespective of the health status. Groups (Gp.) of FAs identified with hierarchical clustering are indicated with red bars on the left.

Correlogram was plotted using the Corrplot function in R.

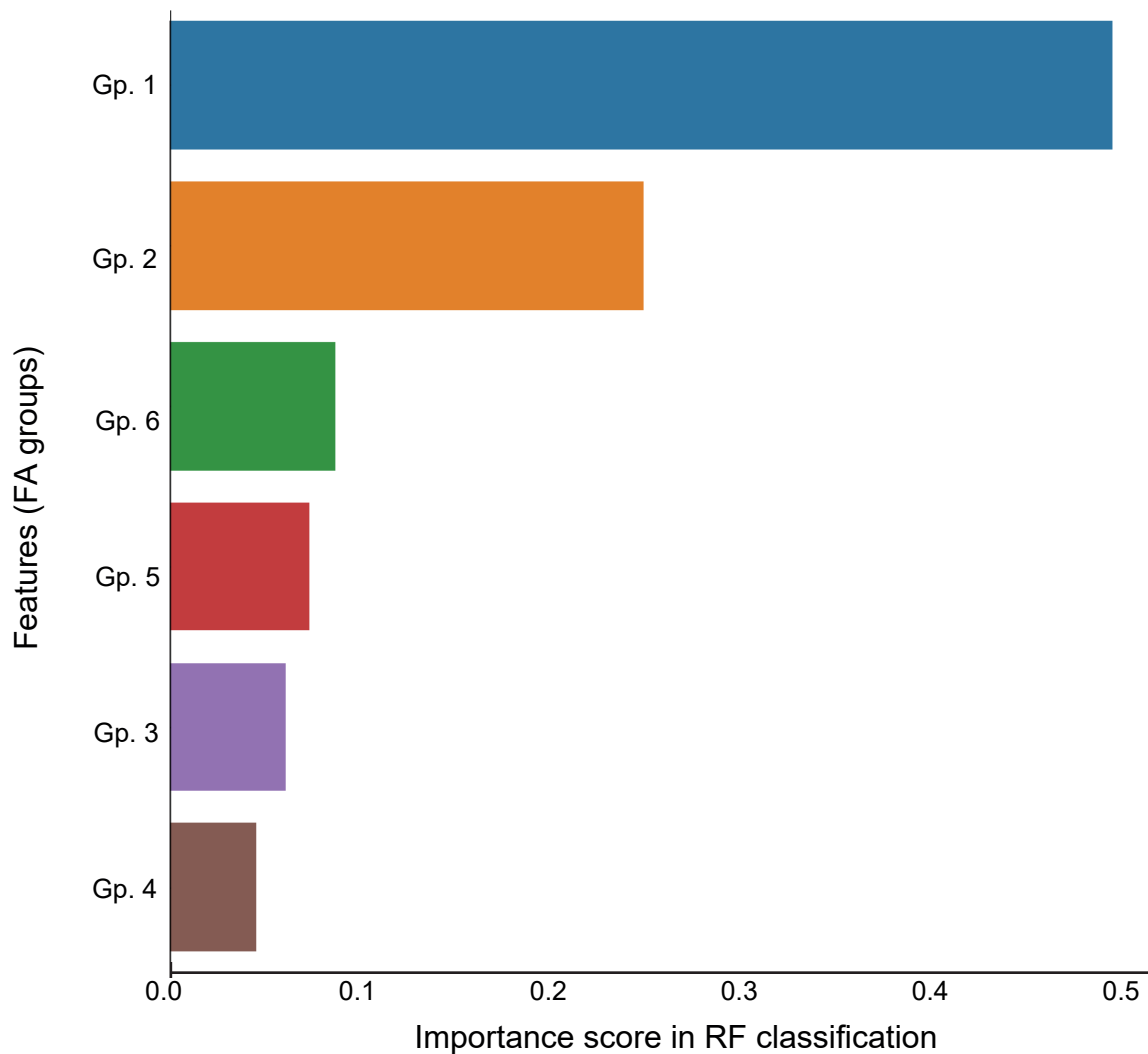

**Supplementary figure 3.** Random forest (RF)-based classification of the samples' inflammatory status. Bar chart showing the feature importance score of each fatty acid (FA) group (Gp.) in the RF-based classification of samples' inflammatory state (as diagnosed). Shown scores are averages of the FA group importance scores over 100 RFs of 100 trees each, run on a 1000-fold enriched dataset (see Materials and Methods for details).



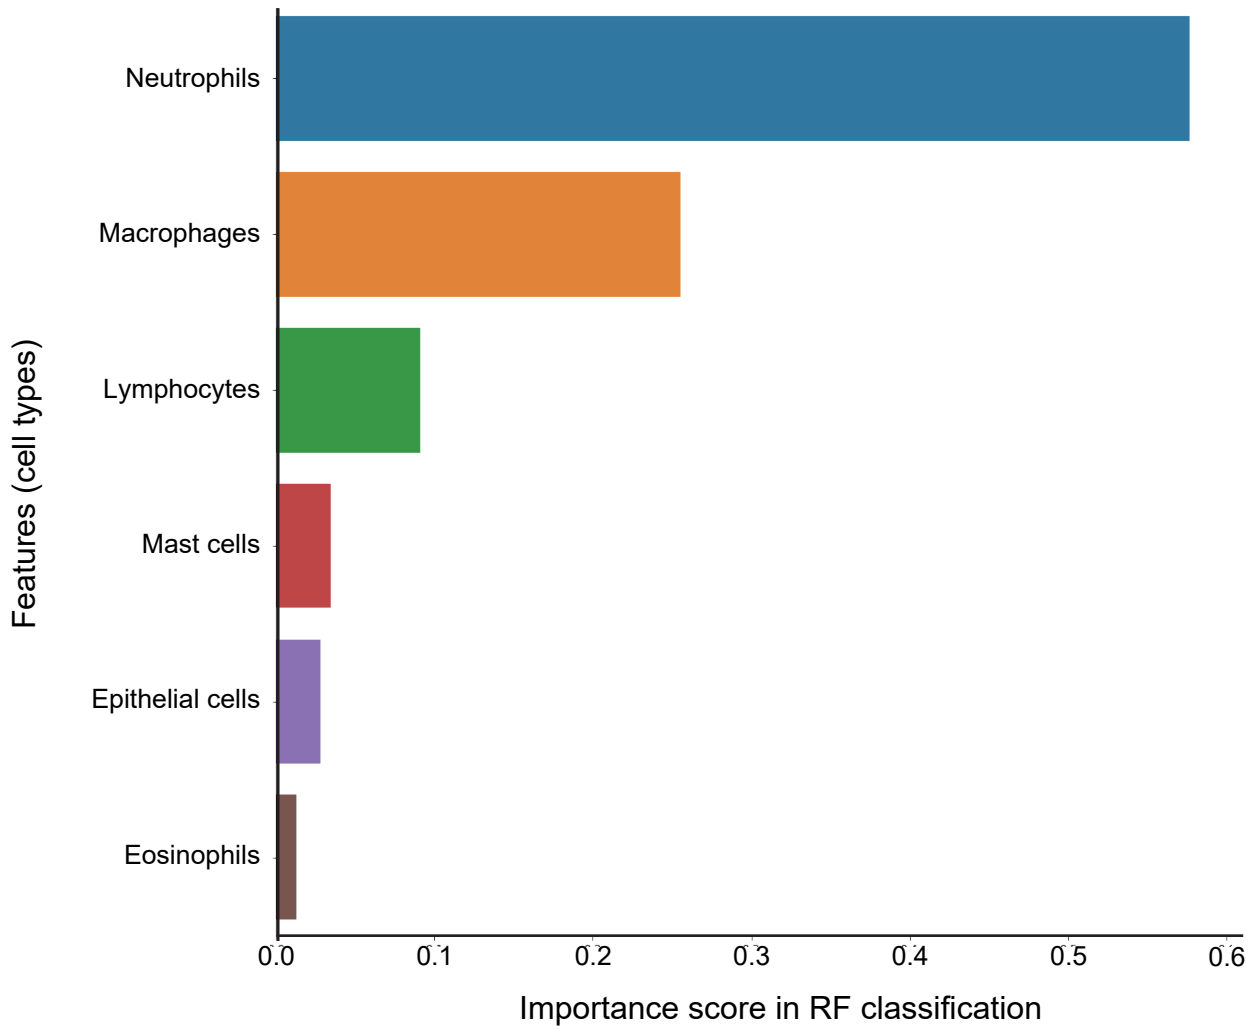

**Supplementary figure 4.** Immune cells in Random forest (RF)-based classification. Bar chart showing the feature importance score of each cell type in the RF-based classification of samples' inflammatory state based on the bronchoalveolar lavage fluid cell-%. Shown scores were obtained using 1 RF of 100 trees, without data enrichment.

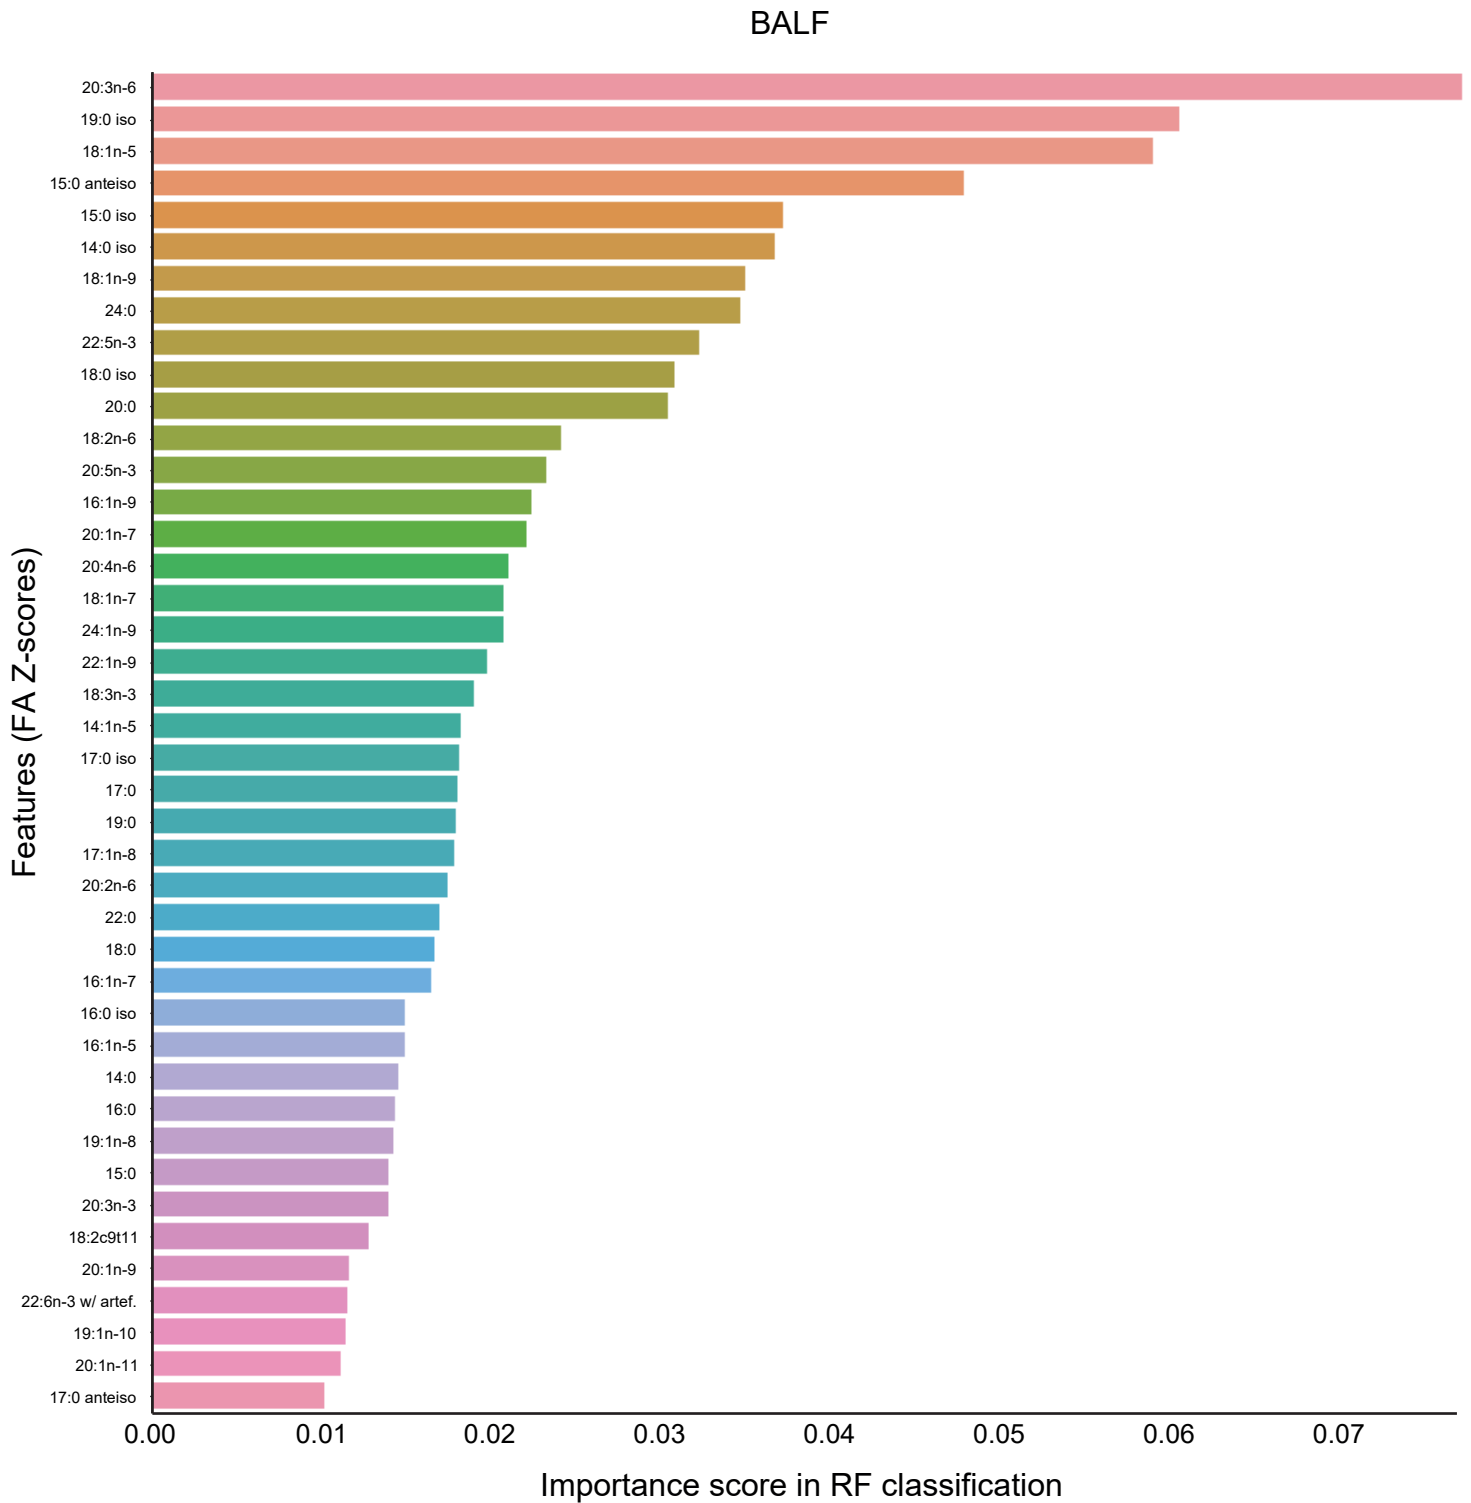

**Supplementary figure 5.** Random forest (RF)-based classification of diagnoses in bronchoalveolar lavage fluid (BALF) samples. Bar chart showing the feature importance score of each fatty acid (measured FA abundance converted to a Z-score) in the RF-based classification of samples' inflammatory state. Shown scores were averaged over 100 RFs of 100 trees, without data enrichment.

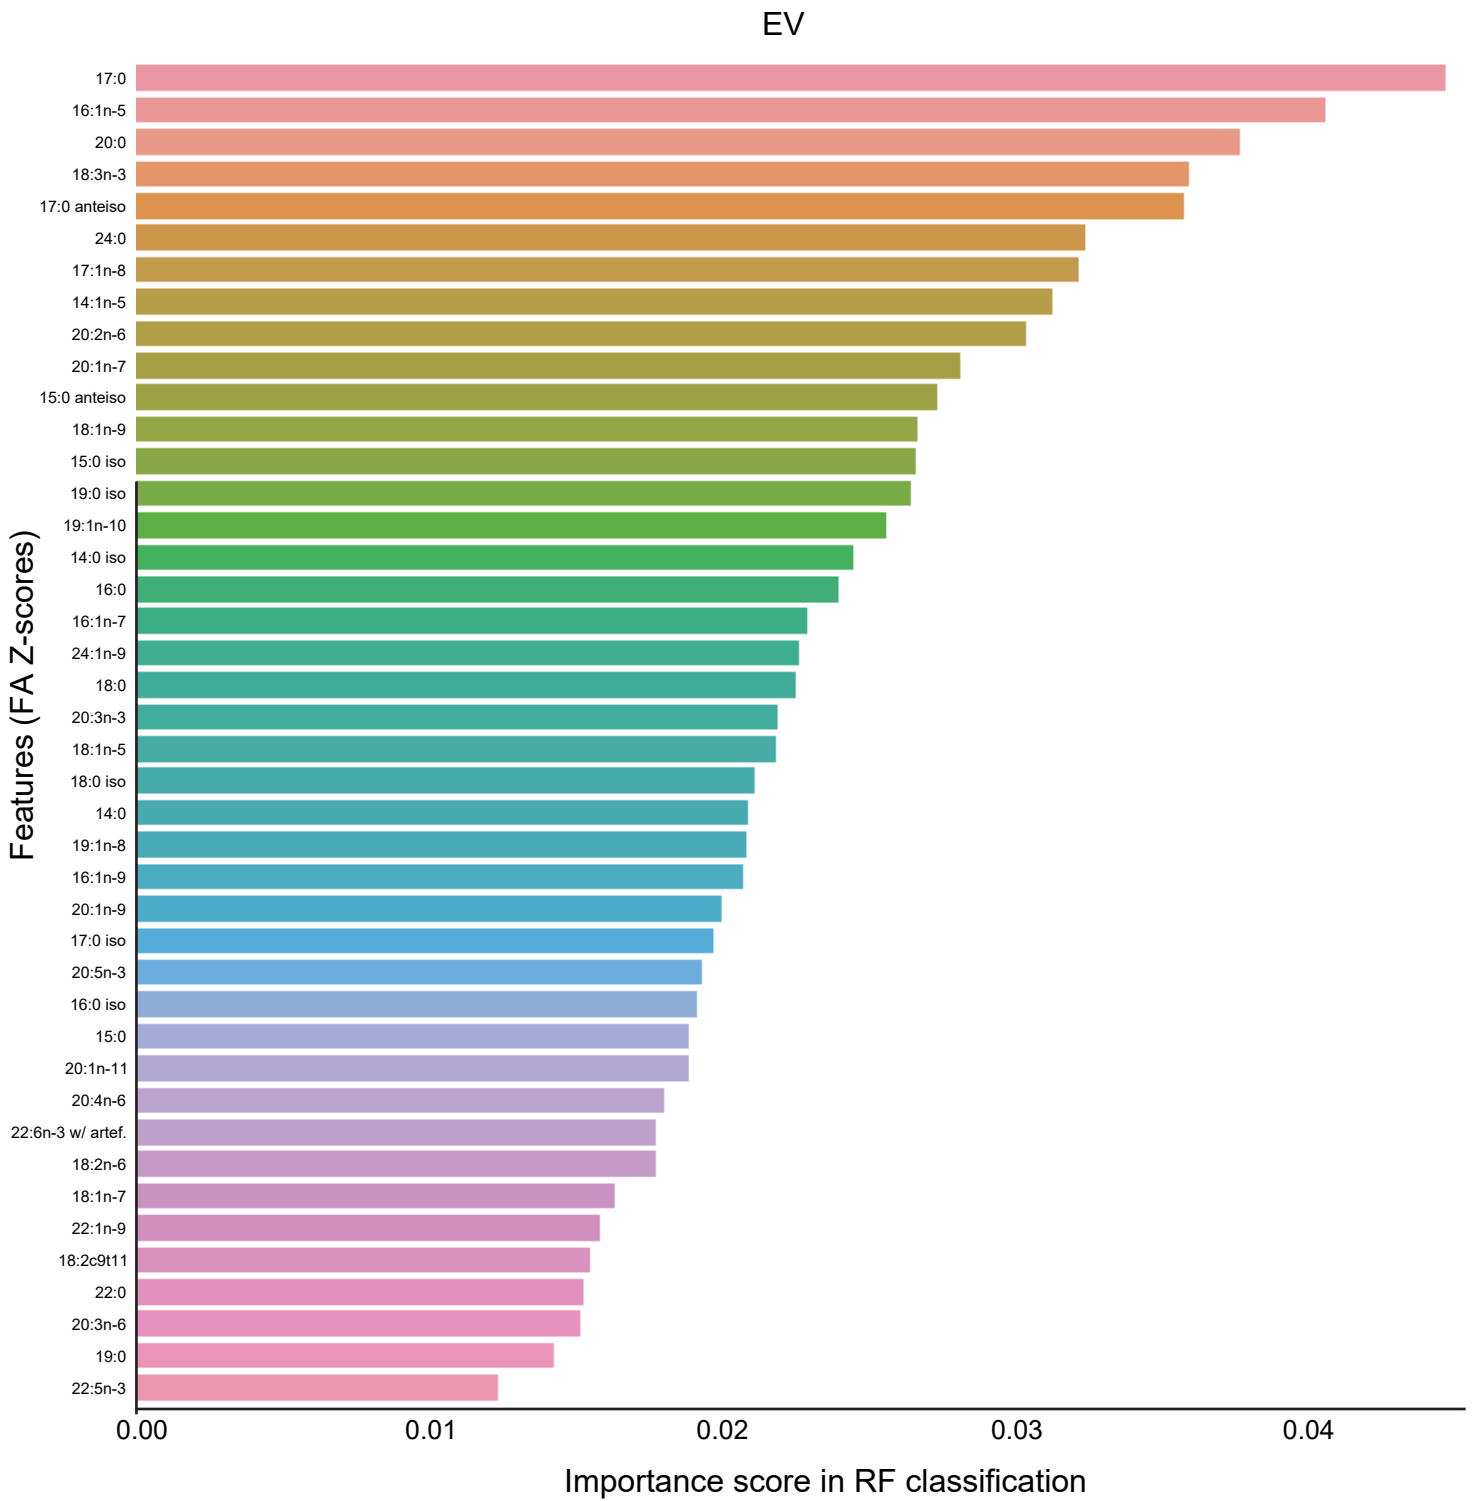

**Supplementary figure 6.** Random forest (RF)-based classification of diagnoses in extracellular vesicle (EV) samples. Bar chart showing the feature importance score of each fatty acid (measured FA abundance converted to a Z-score) in the RF-based classification of samples' inflammatory state. Shown scores were averaged over 100 RFs of 100 trees, without data enrichment.
